# Supplementary material
Source: PubMed Central journal article supplement (PMC3416232)

## Supplementary Material, Netterling et al

### Supplementary Figure Legends

**Supplementary Figure 1** Multiple sequence alignment of Lmo1722 and Lmo1722<sub>ΔCT</sub> from *Listeria monocytogenes* and YfmL from *Bacillus subtilis*. Arrow indicates the deletion point of the Lmo1722<sub>ΔCT</sub> construct.

**Supplementary Figure 2** *L. monocytogenes* and its isogenic  $\Delta lmo1722$  derivative growth on BHI plates at indicated temperatures.

**Supplementary Figure 3.** Western blot analysis examining expression levels of Lmo1722 in indicated *L. monocytogenes* strains. First 6 lanes show indicated amount of purified Lmo1722. Protein samples of lanes 7-15 were isolated from bacteria grown in BHI at 16°C (except lane 15 where the bacteria were grown at 37°C).

**Supplementary Figure 4.** Growth of *L. monocytogenes* strains at different temperatures. Indicated bacteria were streaked on BHI-agar plates and incubated at specified temperatures for different length of time.

**Supplementary Figure 5.** Outline of the primer extension analysis of wild-type + pIMK3 and  $\Delta lmo1722$  + pIMK3 strains as shown in Figure 4C. Fluorescently labeled primers were used

for reverse transcription analysis and the resulting cDNA products were separated and scanned by using a sequencing machine. Purple peaks represent cDNA products and the area of the two most proficient were calculated. The peak representing the mature transcript is an approximately 70 bases long product and the peak representing the immature transcript is an approximately 230 bases long product (bases are shown above graphs (X-axis)). These peaks are indicated by arrows. Absolute fluorescence intensity is shown by the Y-axis.

**Supplementary Table 1.** Oligonucleotides used in this study

| Oligonucleotide name  | Sequence 5'-3'                                                  | Restriction enzyme sites |
|-----------------------|-----------------------------------------------------------------|--------------------------|
| lmo1722-A             | CCCGTCGACGATGGTAAGGTAATTGTCATCG                                 | <i>SalI</i>              |
| lmo1722-B             | CCCGAATTTCGATAGATAGGAAAGCATTTCGC                                | <i>EcoRI</i>             |
| lmo1722-C             | CCCGAATTCCGCTTACTGCAAGTCTGCAC                                   | <i>EcoRI</i>             |
| lmo1722-D             | CCCCCATGGGATGGATTACTATCGGGAGG                                   | <i>NcoI</i>              |
| 1722 Dp+/p-           | CCCCCGTCGACTTAAATGGCATCCTCGCAAC                                 | <i>SalI</i>              |
| 1722 Up-              | CCCCCGGATCCGAGTCGGGTTATGACAGAATCAA                              | <i>BamHI</i>             |
| degU-F                | CGTGAATACCGCCATTTAGC                                            |                          |
| degU-R                | GAAAAGTGTCTCCCAATTCC                                            |                          |
| flaA-F                | CGTGAACAATCAATCCATCG                                            |                          |
| flaA-R                | TTAACATTTGCGGTGTTTGG                                            |                          |
| tmRNA-U               | CGGCACTTAATATCTACGAGC                                           |                          |
| tmRNA-D               | CCTCGTTATCAACGTCAAAGCC                                          |                          |
| lmo1722-F_64_KpnI     | AATTGGTACCGTGCAGACTTGCAGTAAGCGT                                 | <i>KpnI</i>              |
| lmo1722-RH_66_XbaI    | AATTTCTAGATTAGTGATGGTGATGGTGATG<br>AGATTTTTTAAAATTGTTTGGTTTTTTG | <i>XbaI</i>              |
| lmo1722-F_64_BamHI    | AATTGGATCCGTGCAGACTTGCAGTAAGCGT                                 | <i>BamHI</i>             |
| lmo1722-R_62_SalI     | AATTGTCGACATGGCATCCTCGCAACGATAA                                 | <i>SalI</i>              |
| lmo1722-R_noC_64_SalI | AATTGTCGACTTAGTTTTCTGGAACAGCACCGTC                              | <i>SalI</i>              |

# Supplementary Figure 1

CLUSTAL 2.1 multiple sequence alignment

```
Lmo1722      MTES-----NIPSFWAEKWQEHGYETPTEIQSAMYQPIKDGADVLAVSPTGTGKTVAYAL 55
YfmL        MTQTWPFLLHNAQSFIQENWNASGFQKPTPVQEQAQLIMDGKDVIASPTGTGKTLAYAL 60
          **::      *  **  *:::  *::. **  :*.   * * ** **:* *****:****

Lmo1722      PTLEKIEAIPKT-QWLVLAPSHELVMQITEVIRSWLPSDDLTVISLIGGANVKRQIEKLNK 114
YfmL        PVLERIKPEQKHPQAVILAPSRELVMQIFQVIQDQWKAGSELRAASLIGGANVKKQVEKLNK 120
          *..**:::  *  *  ::****:*****  :**:. *  ...: *  . *****:***

Lmo1722      KKPQIIVASPGRALELIKQKKIKMHEIKTITLDECDQLLRQENFKSTLEIVESAVRDRQL 174
YfmL        KHPHIIVGTPGRVFELIKAKKLMHEVKTIVLDETDQLVLPFHRETMTKQIIKTTLRDRQL 180
          *::**.*. :***. :**** **:*:**:***.*** ***:  *:  ::  :*:::****

Lmo1722      TLVSATKLENPDMFFAQTENTPVMLEVTAKPEELTNVEHLYMDVESRDKATLLRRISHIK 234
YfmL        LCFSATLKKETEDVLRLELAQEPVLRKQVRSKAEAGKVKHQYLICDQRDKVKLLQKLSRLE 240
          .***  :::  ::  :  *  :*: *  .  *  :*: *  *  :  :***..**:::***

Lmo1722      DMRGLVFVKDKPRMEILLEKLHYDKVKAAGIHGEIRKEKRKKYLDDFKKGLTYLIVTDV 294
YfmL        GMQALVFVRDIGNLSVYAEKLAYHHVELGVLHSEAKKMERAKI IATFEDGEFPLLLATDI 300
          .*::**:*  *  :::  ***  *:::  .  :*. *  *  *  :  *:: *  .  *::**

Lmo1722      AARGLDIEDLPYVIHYDLAASEKEYTHRSVRTGRMGKSGTVITFANPREIRTLKQYLTIH 354
YfmL        AARGLDIENLPYVIHADIPD-EDGYVHRSGRTGRAGKEGNVLSLVTKLEESKLNK----- 353
          *****:*****  *:.  *  .  *****  **.*.*:::..  *  .**

          ▼ Lmo1722ΔCT
Lmo1722      NLKKGQVRFYQGKLLDGAVPENKIAKKASRPPKQVQKSKKDDGKKPFRKDKPTGAAGGRK 414
YfmL        -----KMAKKG-----VELS-----EAVYAGGKLNK 374
          *::**  .  *:  *  :..  *.*  *

Lmo1722      EKPTNSAKPTRNKPKNKFNKPNNFKKS 441
YfmL        TK----- 376
          *
```

Supplementary Figure 2

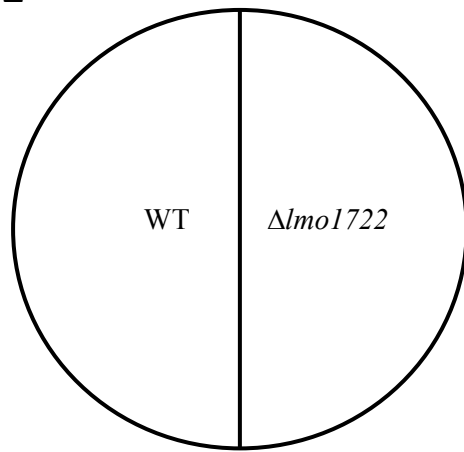

0°C

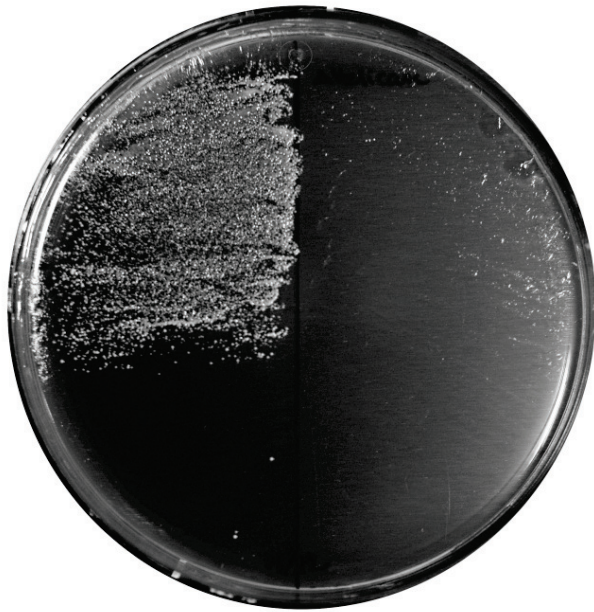

16°C

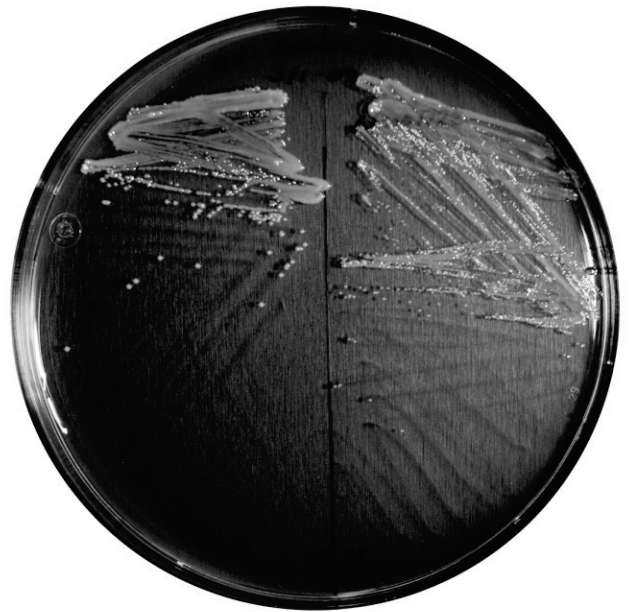

26°C

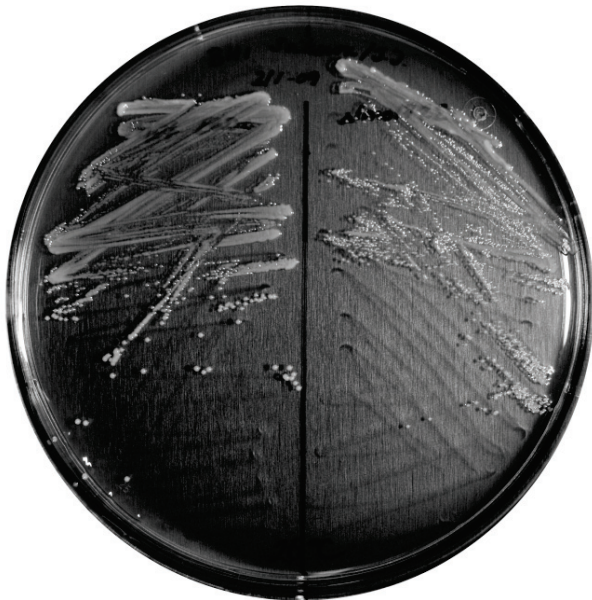

37°C

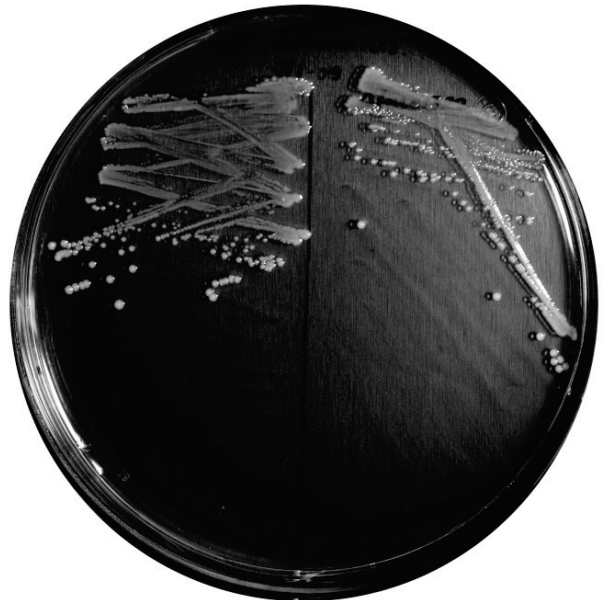

# Supplementary Figure 3

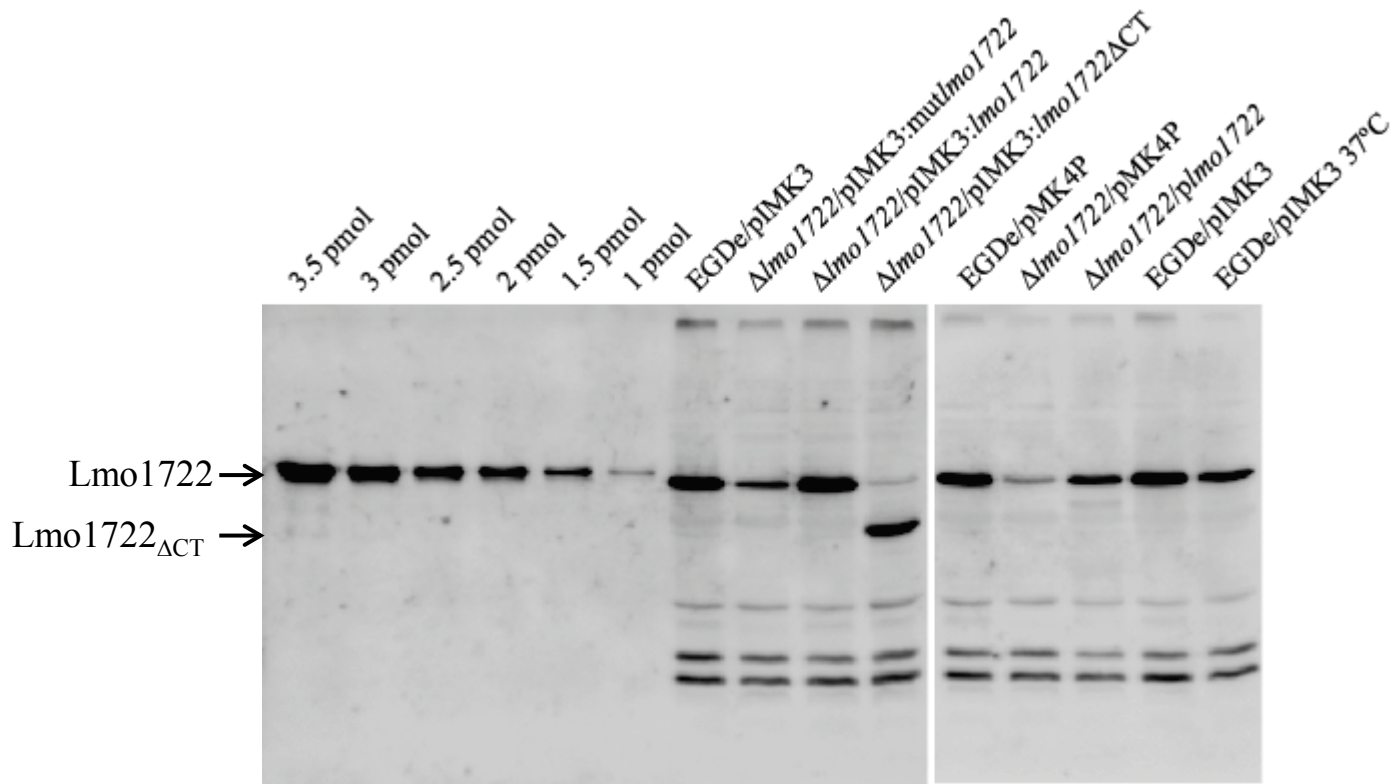



# Supplementary Figure 4

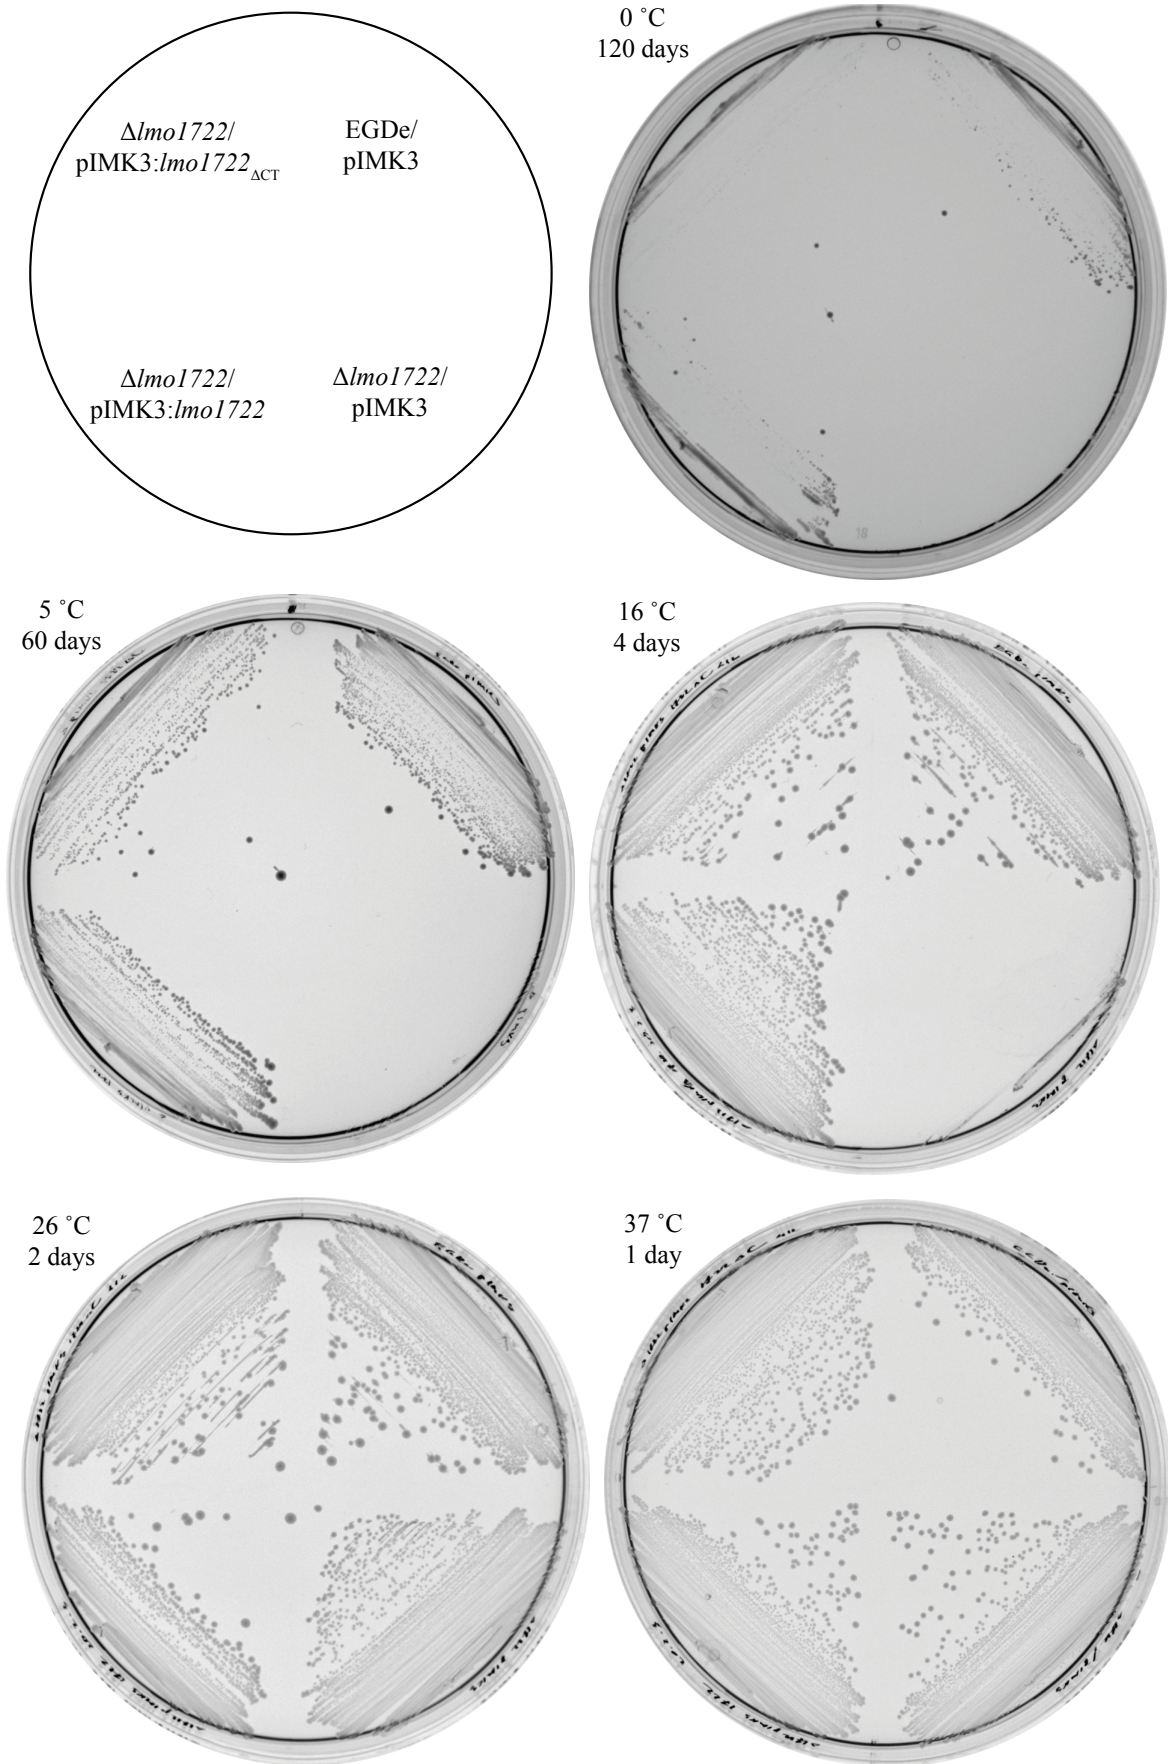

# Supplementary Figure 5

## EGDe/pIMK3

Bases

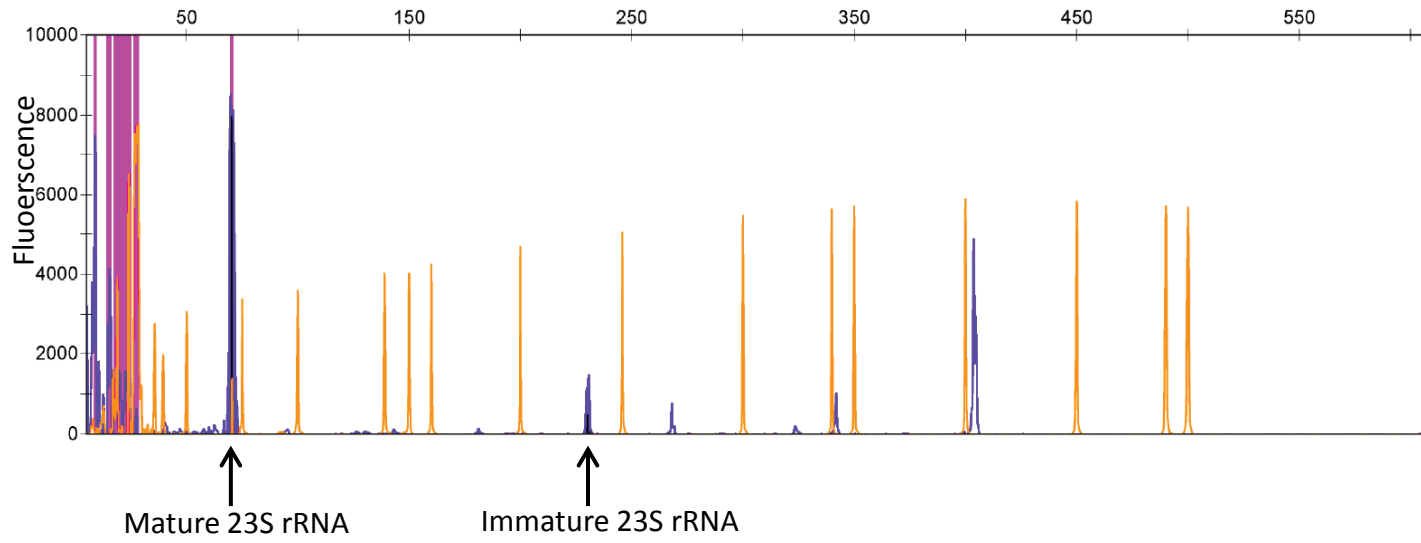

## $\Delta mo1722$ /pIMK3

Bases

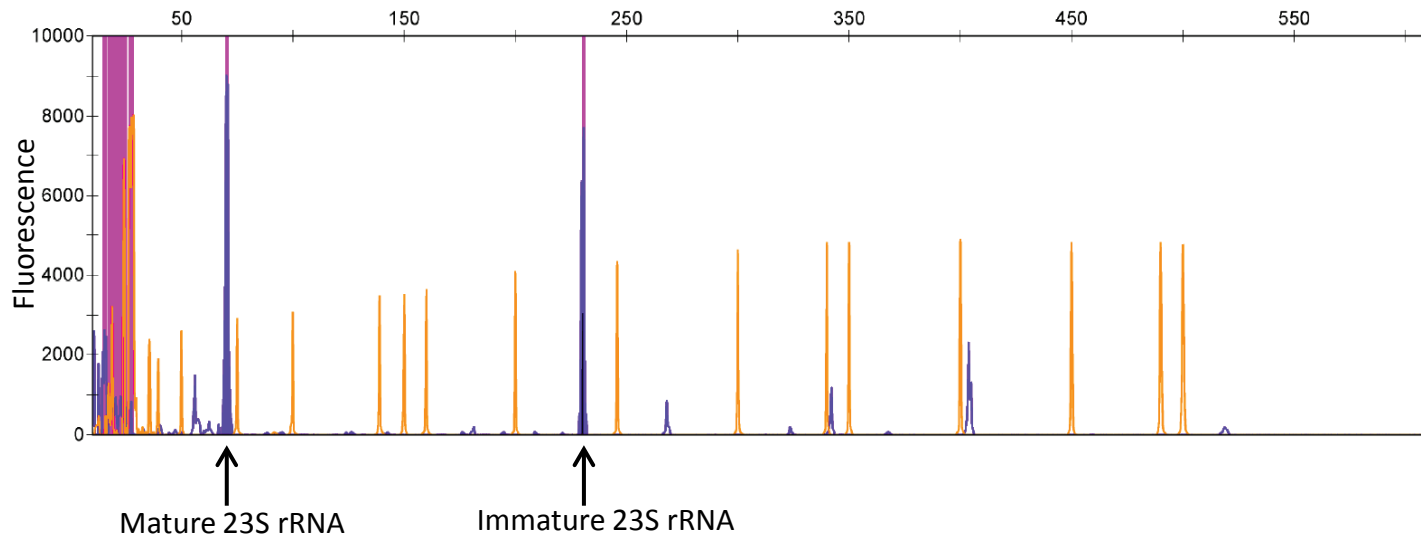

Supplement: JB.00348-12_zjb999091789so1.pdf [file JB.00348-12_zjb999091789so1.pdf]
